# Supplementary figures and images for: DNA Methylation Associated with Mitochondrial Dysfunction in a South African Autism Spectrum Disorder Cohort
Source: PubMed Central journal article supplement — Autism Res. 2020 Jun 3;13(7):1079–93. doi: 10.1002/aur.2310 (PMC7496548; doi:10.1002/aur.2310), 2020-06-03

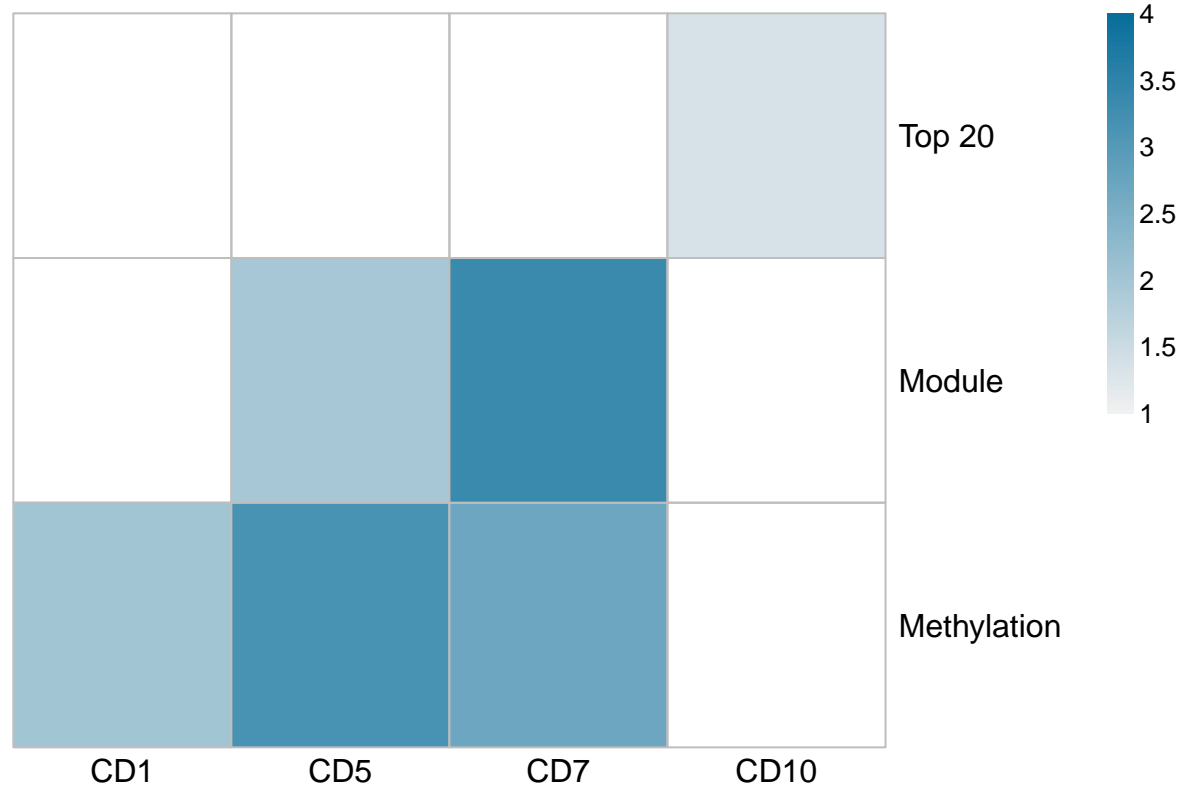

Supplement: AUR-13-1079-s001.pdf [file AUR-13-1079-s001.pdf]

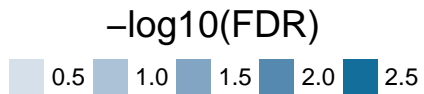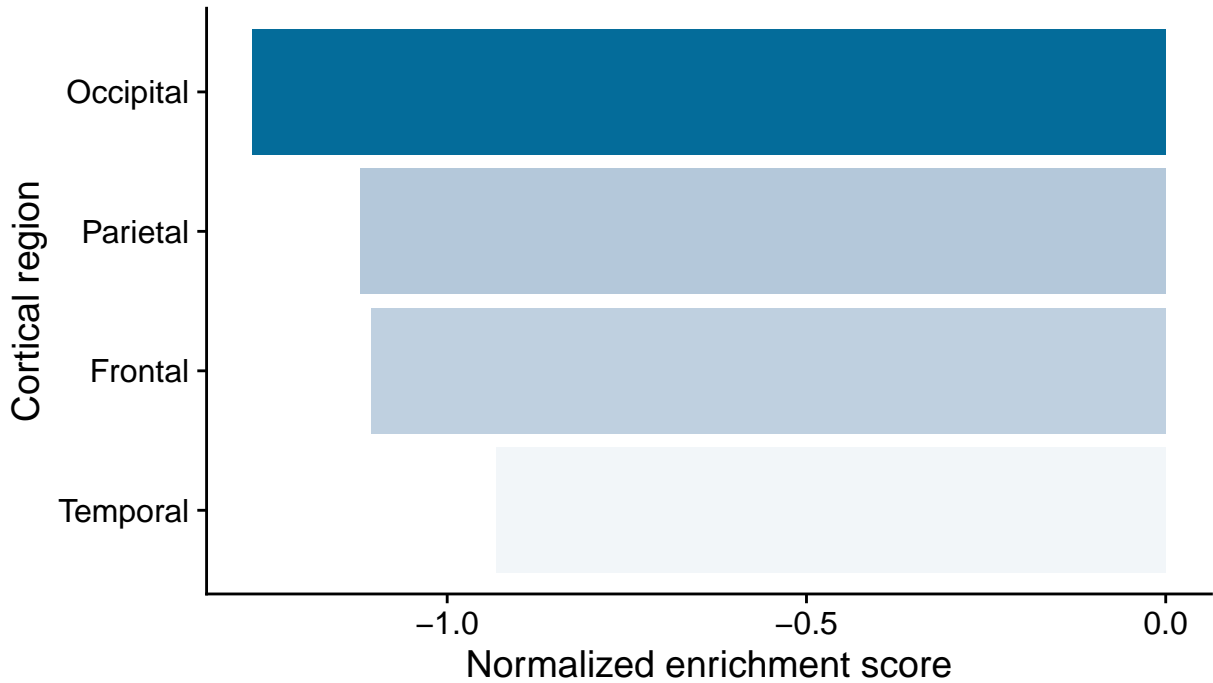

Supplement: AUR-13-1079-s002.pdf [file AUR-13-1079-s002.pdf]
